# Supplementary material for: Meteorological Analysis of the 2021 Extreme Wildfires in Greece: Lessons Learned and Implications for Early Warning of the Potential for Pyroconvection
Source: MDPI journal article supplement (doi:10.3390/atmos13030475), 2022-03-14
Supplement: s1 [file s1]

Archive with 1 entries (1 files):
- atmosphere-1629455-supplementary.pdf
